# Supplementary material
Source: Springer Nature journal article supplement (https://www.springermedizin.de/resource/supplementary/13054_2011_9392_MOESM2_ESM.pdf/9706102)
Supplement: MOESM2 [file 9706102]

Admission episodes to  
ICU (2002 to 2006)  
n=8290

**Excluded Episodes**  
Aged under 16 n=49  
Incomplete admission episodes  
n=208  
Records removed through merging  
inter-ICU transfers n=185

Study population  
n=7848

**PMV cohort**  
Ventilated for  $\geq 21$  days  
n=349

**Non-PMV cohort**  
Ventilated for  $< 21$  days  
n=7499
